# Supplementary material for: Identification of candidate genes for congenital heart defects on proximal chromosome 8p
Source: PubMed Central journal article supplement — Sci Rep. 2016 Nov 3;6:36133. doi: 10.1038/srep36133 (PMC5093561; doi:10.1038/srep36133), 2016-11-03
Supplement: srep36133-s1.pdf [file srep36133-s1.pdf]

|                      |                                                                                          |
|----------------------|------------------------------------------------------------------------------------------|
| <b>Manuscript #:</b> | SREP-16-15686                                                                            |
| <b>By:</b>           | Tingting Li, Chunjie Liu, Yuejuan Xu, Qianqian Guo, Sun Chen, Kun Sun, Rang Xu           |
| <b>Title:</b>        | Identification of candidate genes for congenital heart defects on proximal chromosome 8p |

**Supplemental Table S1. gene list of 18.5-Mb region**

| gene     | OMIM number | expression status in embryonic hearts (MGI database)                                                                                                                | cardiovascular phenotypes in knockout mouse (MGI database)                                                                                                                                                                | Congenital heart disease/phenotype (HGMD database, etc.) |
|----------|-------------|---------------------------------------------------------------------------------------------------------------------------------------------------------------------|---------------------------------------------------------------------------------------------------------------------------------------------------------------------------------------------------------------------------|----------------------------------------------------------|
| PSD3     | 614440      | —                                                                                                                                                                   | —                                                                                                                                                                                                                         | —                                                        |
| INTS10   | 611353      | —                                                                                                                                                                   | —                                                                                                                                                                                                                         | —                                                        |
| LPL      | 609708      | E14.5: heart atrium, heart ventricle                                                                                                                                | abnormal cardiac cell glucose uptake, abnormal cardiovascular system physiology, cardiac fibrosis, cardiac interstitial fibrosis, increased left ventricle diastolic pressure, increased left ventricle systolic pressure | —                                                        |
| SLC18A1  | 193002      | —                                                                                                                                                                   | —                                                                                                                                                                                                                         | —                                                        |
| ATP6V1B2 | 606939      | —                                                                                                                                                                   | —                                                                                                                                                                                                                         | —                                                        |
| LZTS1    | 606551      | —                                                                                                                                                                   | —                                                                                                                                                                                                                         | —                                                        |
| GFRA2    | 601956      | —                                                                                                                                                                   | —                                                                                                                                                                                                                         | —                                                        |
| DOK2     | 604997      | —                                                                                                                                                                   | —                                                                                                                                                                                                                         | —                                                        |
| XPO7     | 606140      | E14.0, E18.0: heart                                                                                                                                                 | —                                                                                                                                                                                                                         | —                                                        |
| NPM2     | 608073      | —                                                                                                                                                                   | —                                                                                                                                                                                                                         | —                                                        |
| FGF17    | 603725      | E7.5, E8.0: heart; E12.5: arch of aorta, innominate artery, dorsal aorta; E15.5: arterial system; E16.5: pulmonary artery, descending thoracic aorta                | —                                                                                                                                                                                                                         | —                                                        |
| EPB49    | 125305      | —                                                                                                                                                                   | —                                                                                                                                                                                                                         | —                                                        |
| HR       | 602302      | —                                                                                                                                                                   | —                                                                                                                                                                                                                         | —                                                        |
| REEP4    | 609349      | —                                                                                                                                                                   | —                                                                                                                                                                                                                         | —                                                        |
| LGI3     | 608302      | —                                                                                                                                                                   | —                                                                                                                                                                                                                         | —                                                        |
| SFTPC    | 178620      | —                                                                                                                                                                   | abnormal lung vasculature morphology                                                                                                                                                                                      | —                                                        |
| BMP1     | 112264      | E7.5:cardiogenic plate; E8.5:heart; E11.0:atrioventricular canal, endocardial cushion; E12.5: atrioventricular endocardial cushion, aortico-pulmonary spiral septum | —                                                                                                                                                                                                                         | —                                                        |
| PHYHIP   | 608511      | —                                                                                                                                                                   | —                                                                                                                                                                                                                         | —                                                        |

|           |        |                                                                                                                                             |                                                                                                                                                                                                                                                                                                                                                                      |                                              |
|-----------|--------|---------------------------------------------------------------------------------------------------------------------------------------------|----------------------------------------------------------------------------------------------------------------------------------------------------------------------------------------------------------------------------------------------------------------------------------------------------------------------------------------------------------------------|----------------------------------------------|
| MIR320A   | 614112 | —                                                                                                                                           | —                                                                                                                                                                                                                                                                                                                                                                    | —                                            |
| PIWIL2    | 610312 | —                                                                                                                                           | —                                                                                                                                                                                                                                                                                                                                                                    | —                                            |
| SLC39A14  | 608736 | —                                                                                                                                           | —                                                                                                                                                                                                                                                                                                                                                                    | —                                            |
| PPP3CC    | 114107 | —                                                                                                                                           | —                                                                                                                                                                                                                                                                                                                                                                    | —                                            |
| SORBS3    | 610795 | E8.5, E9.5: heart; E10.5:<br>atrioventricular canal, outflow<br>tract; E13.5: heart; E14.5: heart<br>ventricle                              | —                                                                                                                                                                                                                                                                                                                                                                    | —                                            |
| PDLIM2    | 609722 | —                                                                                                                                           | —                                                                                                                                                                                                                                                                                                                                                                    | —                                            |
| KIAA1967  | 607359 | —                                                                                                                                           | —                                                                                                                                                                                                                                                                                                                                                                    | —                                            |
| BIN3      | 606396 | —                                                                                                                                           | —                                                                                                                                                                                                                                                                                                                                                                    | —                                            |
| EGR3      | 602419 | —                                                                                                                                           | —                                                                                                                                                                                                                                                                                                                                                                    | —                                            |
| PEBP4     | 612473 | —                                                                                                                                           | —                                                                                                                                                                                                                                                                                                                                                                    | —                                            |
| RHOBTB2   | 607352 | E13.5: heart                                                                                                                                | —                                                                                                                                                                                                                                                                                                                                                                    | —                                            |
| TNFRSF10B | 603612 | —                                                                                                                                           | —                                                                                                                                                                                                                                                                                                                                                                    | —                                            |
| TNFRSF10C | 603613 | —                                                                                                                                           | —                                                                                                                                                                                                                                                                                                                                                                    | —                                            |
| TNFRSF10D | 603614 | —                                                                                                                                           | —                                                                                                                                                                                                                                                                                                                                                                    | —                                            |
| TNFRSF10A | 603611 | —                                                                                                                                           | —                                                                                                                                                                                                                                                                                                                                                                    | —                                            |
| CHMP7     | 611130 | —                                                                                                                                           | —                                                                                                                                                                                                                                                                                                                                                                    | —                                            |
| LOXL2     | 606663 | —                                                                                                                                           | abnormal liver vasculature<br>morphology , abnormal<br>interventricular septum<br>morphology                                                                                                                                                                                                                                                                         | —                                            |
| ENTPD4    | 607577 | E14.5: heart atrium,<br>cardiovascular system                                                                                               | —                                                                                                                                                                                                                                                                                                                                                                    | —                                            |
| SLC25A37  | 610387 | —                                                                                                                                           | —                                                                                                                                                                                                                                                                                                                                                                    | —                                            |
| NKX3-1    | 602041 | E9.5: heart, dorsal aorta;<br>E11.5:vertebral artery, dorsal<br>aorta, common dorsal aorta;<br>E13.5: common carotid artery;<br>E15.5:aorta | —                                                                                                                                                                                                                                                                                                                                                                    | —                                            |
| NKX2-6    | 611770 | E8.0, E8.5: heart; E8.5: sinus<br>venosus; E9.0: heart; E10.0:<br>outflow tract                                                             | Nkx2-5-/Nkx2-5-,<br>Nkx2-6-/Nkx2-6+: absent<br>atrioventricular<br>cushions,embryonic lethality<br>during organogenesis;<br>Nkx2-5-/Nkx2-5-,<br>Nkx2-6-/Nkx2-6-: absent<br>atrioventricular cushions,<br>decreased cell proliferation,<br>embryonic growth retardation,<br>embryonic lethality during<br>organogenesis, complete<br>penetrance, increased apoptosis, | common arterial trunk,<br>TFO, DORV, and VSD |

|          |        |                                                                                              |   |                                                                                                                                                                                                                                                                                                                                                                          |   |
|----------|--------|----------------------------------------------------------------------------------------------|---|--------------------------------------------------------------------------------------------------------------------------------------------------------------------------------------------------------------------------------------------------------------------------------------------------------------------------------------------------------------------------|---|
|          |        |                                                                                              |   | pericardial effusion, pharynx<br>hypoplasia                                                                                                                                                                                                                                                                                                                              |   |
|          |        | E8.5: heart; E11.5: atrium                                                                   |   |                                                                                                                                                                                                                                                                                                                                                                          |   |
| STC1     | 601185 | cardiac muscle,ventricle cardiac<br>muscle; E13.5: ventricle cardiac<br>muscle; E15.5: heart | — | —                                                                                                                                                                                                                                                                                                                                                                        | — |
| ADAM28   | 606188 | —                                                                                            | — | —                                                                                                                                                                                                                                                                                                                                                                        | — |
| ADAMDEC1 | 606393 | —                                                                                            | — | —                                                                                                                                                                                                                                                                                                                                                                        | — |
| ADAM7    | 607310 | —                                                                                            | — | —                                                                                                                                                                                                                                                                                                                                                                        | — |
| NEFM     | 162250 | —                                                                                            | — | —                                                                                                                                                                                                                                                                                                                                                                        | — |
| NEFL     | 162280 | —                                                                                            | — | —                                                                                                                                                                                                                                                                                                                                                                        | — |
| GNRH1    | 152760 | —                                                                                            | — | —                                                                                                                                                                                                                                                                                                                                                                        | — |
| EBF2     | 609934 | —                                                                                            | — | —                                                                                                                                                                                                                                                                                                                                                                        | — |
| PPP2R2A  | 604941 | —                                                                                            | — | —                                                                                                                                                                                                                                                                                                                                                                        | — |
|          |        |                                                                                              |   | abnormal heart left ventricle<br>morphology ( late after pressure<br>overload, mice exhibit reduced<br>left ventricular end-diastolic<br>diameter, left ventricular<br>dilation, and ventricular<br>remodeling), cardiac fibrosis,<br>increased cardiac muscle<br>contractility, decreased<br>cardiomyocyte apoptosis,<br>altered response of heart to<br>induced stress |   |
| BNIP3L   | 605368 | —                                                                                            | — | —                                                                                                                                                                                                                                                                                                                                                                        | — |
| PNMA2    | 603970 | —                                                                                            | — | —                                                                                                                                                                                                                                                                                                                                                                        | — |
| DPYSL2   | 602463 | —                                                                                            | — | —                                                                                                                                                                                                                                                                                                                                                                        | — |
|          |        |                                                                                              |   | decreased vasoconstriction,<br>decreased heart rate variability,<br>hypotension                                                                                                                                                                                                                                                                                          |   |
| ADRA1A   | 104221 | —                                                                                            | — | —                                                                                                                                                                                                                                                                                                                                                                        | — |
|          |        |                                                                                              |   | abnormal physiological<br>neovascularization, abnormal                                                                                                                                                                                                                                                                                                                   |   |
| PTK2B    | 601212 | —                                                                                            | — | —                                                                                                                                                                                                                                                                                                                                                                        | — |
|          |        |                                                                                              |   | vascular endothelial cell<br>migration, decreased<br>vasodilation                                                                                                                                                                                                                                                                                                        |   |
| CHRNA2   | 118502 | —                                                                                            | — | —                                                                                                                                                                                                                                                                                                                                                                        | — |
|          |        |                                                                                              |   | decreased systemic arterial<br>systolic blood pressure,                                                                                                                                                                                                                                                                                                                  |   |
| EPHX2    | 132811 | E14.5: heart atrium, heart<br>ventricle, cardiovascular system                               | — | —                                                                                                                                                                                                                                                                                                                                                                        | — |
|          |        |                                                                                              |   | abnormal retinal vasculature<br>morphology, abnormal vascular<br>branching morphogenesis                                                                                                                                                                                                                                                                                 |   |
| CLU      | 185430 | E14.5: heart atrium, heart<br>ventricle, cardiovascular system,                              | — | —                                                                                                                                                                                                                                                                                                                                                                        | — |
|          |        |                                                                                              |   | abnormal glomerular capillary<br>morphology, abnormal heart                                                                                                                                                                                                                                                                                                              |   |

|          |        |                                                                                                                          |   |                                                                                                                                                                                                                                                                 |   |
|----------|--------|--------------------------------------------------------------------------------------------------------------------------|---|-----------------------------------------------------------------------------------------------------------------------------------------------------------------------------------------------------------------------------------------------------------------|---|
|          |        | blood vessel                                                                                                             |   | morphology, abnormal<br>myocardium layer morphology,<br>abnormal myocardial fiber<br>morphology, decreased<br>myocardial fiber number,<br>abnormal heart ventricle<br>morphology, decreased cardiac<br>muscle contractility, heart<br>inflammation, myocarditis |   |
| SCARA3   | 602728 | —                                                                                                                        | — | —                                                                                                                                                                                                                                                               | — |
| ESCO2    | 609353 | E14.5: heart atrium, heart<br>ventricle, cardiovascular system                                                           | — | —                                                                                                                                                                                                                                                               | — |
| PBK      | 611210 | E14.5: heart atrium, heart<br>ventricle, cardiovascular system                                                           | — | —                                                                                                                                                                                                                                                               | — |
| SCARA5   | 611306 | E12.5: heart                                                                                                             | — | —                                                                                                                                                                                                                                                               | — |
| ELP3     | 612722 | —                                                                                                                        | — | —                                                                                                                                                                                                                                                               | — |
| PNOC     | 601459 | —                                                                                                                        | — | —                                                                                                                                                                                                                                                               | — |
| ZNF395   | 609494 | —                                                                                                                        | — | —                                                                                                                                                                                                                                                               | — |
| FBXO16   | 608519 | —                                                                                                                        | — | —                                                                                                                                                                                                                                                               | — |
| FZD3     | 606143 | —                                                                                                                        | — | —                                                                                                                                                                                                                                                               | — |
| EXTL3    | 605744 | E14.5: heart atrium, heart<br>ventricle, cardiovascular system,<br>heart valve                                           | — | —                                                                                                                                                                                                                                                               | — |
| INTS9    | 611352 | —                                                                                                                        | — | —                                                                                                                                                                                                                                                               | — |
| KIF13B   | 607350 | —                                                                                                                        | — | —                                                                                                                                                                                                                                                               | — |
| DUSP4    | 602747 | —                                                                                                                        | — | —                                                                                                                                                                                                                                                               | — |
| TMEM66   | 614768 | —                                                                                                                        | — | —                                                                                                                                                                                                                                                               | — |
| LEPROTL1 | 607338 | —                                                                                                                        | — | abnormal heart left ventricle<br>morphology, thick ventricular<br>wall, increased heart rate                                                                                                                                                                    | — |
| MBOAT4   | 611940 | —                                                                                                                        | — | —                                                                                                                                                                                                                                                               | — |
| DCTN6    | 612963 | —                                                                                                                        | — | —                                                                                                                                                                                                                                                               | — |
| RBPM5    | 601558 | E9.5: heart atrium, outflow tract,<br>primitive ventricle, sinus<br>venosus; E10.5: heart atrium,<br>primitive ventricle | — | —                                                                                                                                                                                                                                                               | — |
| GTF2E2   | 189964 | —                                                                                                                        | — | —                                                                                                                                                                                                                                                               | — |
| GSR      | 138300 | —                                                                                                                        | — | abnormal retinal vasculature<br>morphology                                                                                                                                                                                                                      | — |
| UBXN8    | 602155 | —                                                                                                                        | — | —                                                                                                                                                                                                                                                               | — |
| PPP2CB   | 176916 | —                                                                                                                        | — | —                                                                                                                                                                                                                                                               | — |
| TEX15    | 605795 | —                                                                                                                        | — | —                                                                                                                                                                                                                                                               | — |
| WRN      | 604611 | —                                                                                                                        | — | aortic valve stenosis, cardiac<br>interstitial fibrosis, increased                                                                                                                                                                                              | — |

|      |        |                                                                                                                                                                                                                                                                                                                                                                                                                                                                                                                                                                                                                                                                                                                                                                                                                                                                                                            |                                                                                                                                                                                                                                                                                                                                                                                                                                                                                                                                                                                                                                                                     |   |
|------|--------|------------------------------------------------------------------------------------------------------------------------------------------------------------------------------------------------------------------------------------------------------------------------------------------------------------------------------------------------------------------------------------------------------------------------------------------------------------------------------------------------------------------------------------------------------------------------------------------------------------------------------------------------------------------------------------------------------------------------------------------------------------------------------------------------------------------------------------------------------------------------------------------------------------|---------------------------------------------------------------------------------------------------------------------------------------------------------------------------------------------------------------------------------------------------------------------------------------------------------------------------------------------------------------------------------------------------------------------------------------------------------------------------------------------------------------------------------------------------------------------------------------------------------------------------------------------------------------------|---|
|      |        |                                                                                                                                                                                                                                                                                                                                                                                                                                                                                                                                                                                                                                                                                                                                                                                                                                                                                                            | left ventricle systolic pressure, decreased systemic arterial diastolic blood pressure, heart inflammation                                                                                                                                                                                                                                                                                                                                                                                                                                                                                                                                                          |   |
|      |        | E8.5: primitive ventricle endocardial tube; E9.5: common atrial chamber endocardial lining, endocardial cushion, primitive ventricle endocardial lining; E11.5: endocardial cushion; E12.0: endocardial lining; E12.5: endocardial cushion; E13.5: endocardial cushion; E15.0: interventricular septum endocardial lining, left atrium auricular region endocardial lining, left atrium endocardial lining, left ventricle endocardial lining, right atrium auricular region endocardial lining, right atrium endocardial lining, right ventricle endocardial lining, endocardial tissue; E18.0: interventricular septum endocardial lining, left atrium auricular region endocardial lining, left atrium endocardial lining, left ventricle endocardial lining, right atrium auricular region endocardial lining, right atrium endocardial lining, right ventricle endocardial lining, endocardial tissue | cardiovascular system phenotype, abnormal heart morphology, abnormal atrioventricular cushion morphology, failure of atrioventricular cushion closure, abnormal myocardium layer morphology, decreased heart weight, enlarged heart, abnormal heart ventricle morphology, absent trabeculae carnae, trabecula carnea hypoplasia, thin ventricular wall, dilated heart ventricle, enlarged pericardium, abnormal cardiovascular system, decreased cardiac output physiology, poor circulation, decreased cardiac muscle contractility, decreased ventricle muscle contractility, creased left ventricle systolic pressure, decreased heart rate, irregular heartbeat | — |
| NRG1 | 142445 |                                                                                                                                                                                                                                                                                                                                                                                                                                                                                                                                                                                                                                                                                                                                                                                                                                                                                                            |                                                                                                                                                                                                                                                                                                                                                                                                                                                                                                                                                                                                                                                                     |   |
| TTI2 | 614426 | —                                                                                                                                                                                                                                                                                                                                                                                                                                                                                                                                                                                                                                                                                                                                                                                                                                                                                                          | —                                                                                                                                                                                                                                                                                                                                                                                                                                                                                                                                                                                                                                                                   | — |

**Supplemental Table S2. The data quality of exome sequencing**

| <b>Samples Name</b> | <b>Total reads</b> | <b>Good reads</b> | <b>Total base</b> | <b>Q20(%)<sup>1</sup></b> | <b>Q30(%)<sup>1</sup></b> | <b>Mapped Reads</b> | <b>Mapped Ratio(%)</b> |
|---------------------|--------------------|-------------------|-------------------|---------------------------|---------------------------|---------------------|------------------------|
| ASD patient         | 84,357,684         | 84,357,684        | 12,653,652,600    | 96.48                     | 91.70                     | 84,275,124          | 99.9                   |
| Proband             | 81,857,278         | 81,857,278        | 12,278,591,700    | 96.35                     | 91.43                     | 81,776,072          | 99.9                   |

  

| <b>Samples Name</b> | <b>Unique Mapped Reads</b> | <b>Unique Mapped Ratio(%)</b> | <b>Reads on target Region (%)</b> | <b>Mean depth</b> | <b>Coverage <math>\geq 1X</math>(%)</b> | <b>Coverage <math>\geq 10X</math>(%)</b> | <b>Coverage <math>\geq 20X</math>(%)</b> |
|---------------------|----------------------------|-------------------------------|-----------------------------------|-------------------|-----------------------------------------|------------------------------------------|------------------------------------------|
| ASD patient         | 73,803,937                 | 87.49                         | 74.58                             | 113.97            | 99.33                                   | 98.36                                    | 96.99                                    |
| Proband             | 72,029,667                 | 87.99                         | 74.50                             | 111.65            | 99.34                                   | 98.36                                    | 96.94                                    |

1. Q20 means bases of  $Q \geq 20$  / all bases of sequencing, Q30 means bases of  $Q \geq 30$  / all bases of sequencing

**Supplemental Table S3. The sequencing quality of other CHD genes in the ASD patient**

| <b>Target gene</b> | <b>Sequencing data amount</b> | <b>Target base</b> | <b>Mean depth</b> | <b>Coverage <math>\geq 1X(\%)</math></b> | <b>Coverage <math>\geq 10X(\%)</math></b> | <b>Coverage <math>\geq 20X(\%)</math></b> |
|--------------------|-------------------------------|--------------------|-------------------|------------------------------------------|-------------------------------------------|-------------------------------------------|
| <b>GATA4</b>       | 177353                        | 2254               | 78.68             | 100                                      | 99.78                                     | 90.42                                     |
| <b>NKX2-5</b>      | 183402                        | 1606               | 114.2             | 100                                      | 94.65                                     | 93.65                                     |
| <b>TBX5</b>        | 305702                        | 2652               | 115.27            | 100                                      | 100                                       | 100                                       |
| <b>JAG1</b>        | 810728                        | 7000               | 115.82            | 100                                      | 100                                       | 99.66                                     |
| <b>NOTCH1</b>      | 1398368                       | 10650              | 131.3             | 100                                      | 99.38                                     | 96.3                                      |
| NOTCH2             | 1241114                       | 11136              | 111.45            | 100                                      | 100                                       | 99.69                                     |
| TBX1               | 259406                        | 2291               | 113.23            | 100                                      | 99.87                                     | 94.85                                     |
| GATA6              | 196661                        | 2149               | 91.51             | 100                                      | 90.55                                     | 83.76                                     |
| CITED2             | 177824                        | 1007               | 176.59            | 100                                      | 100                                       | 100                                       |
| ZFPM2<br>(FOG2)    | 611859                        | 5278               | 115.93            | 100                                      | 100                                       | 100                                       |
| ISL1               | 221116                        | 1631               | 135.57            | 100                                      | 100                                       | 100                                       |
| MEF2C              | 314712                        | 2501               | 125.83            | 100                                      | 100                                       | 99.24                                     |
| NR2F2              | 323789                        | 1875               | 172.69            | 100                                      | 100                                       | 100                                       |
| PITX2              | 316664                        | 2123               | 149.16            | 100                                      | 100                                       | 100                                       |
| SRF                | 383763                        | 2713               | 141.45            | 100                                      | 100                                       | 99.48                                     |

**The sequencing quality of other CHD genes in the proband**

| <b>Target gene</b> | <b>Sequencing data amount</b> | <b>Target base</b> | <b>Mean depth</b> | <b>Coverage <math>\geq 1X(\%)</math></b> | <b>Coverage <math>\geq 10X(\%)</math></b> | <b>Coverage <math>\geq 20X(\%)</math></b> |
|--------------------|-------------------------------|--------------------|-------------------|------------------------------------------|-------------------------------------------|-------------------------------------------|
| <b>GATA4</b>       | 175042                        | 2254               | 77.66             | 100                                      | 98.67                                     | 84.65                                     |
| <b>NKX2-5</b>      | 216595                        | 1606               | 134.87            | 100                                      | 99.38                                     | 95.45                                     |
| <b>TBX5</b>        | 312055                        | 2652               | 117.67            | 100                                      | 100                                       | 100                                       |
| <b>JAG1</b>        | 823861                        | 7000               | 117.69            | 100                                      | 100                                       | 99.46                                     |
| <b>NOTCH1</b>      | 1463326                       | 10650              | 137.4             | 100                                      | 99.59                                     | 96.15                                     |
| NOTCH2             | 1204863                       | 11136              | 108.2             | 100                                      | 100                                       | 99.87                                     |
| TBX1               | 270063                        | 2291               | 117.88            | 100                                      | 100                                       | 98.34                                     |
| GATA6              | 216836                        | 2149               | 100.9             | 100                                      | 100                                       | 83.25                                     |
| CITED2             | 189900                        | 1007               | 188.58            | 100                                      | 100                                       | 100                                       |
| ZFPM2<br>(FOG2)    | 594682                        | 5278               | 112.67            | 100                                      | 100                                       | 100                                       |
| ISL1               | 233953                        | 1631               | 143.44            | 100                                      | 100                                       | 99.45                                     |
| MEF2C              | 312051                        | 2501               | 124.77            | 100                                      | 100                                       | 100                                       |
| NR2F2              | 382517                        | 1875               | 204.01            | 100                                      | 100                                       | 100                                       |
| PITX2              | 327443                        | 2123               | 154.24            | 100                                      | 100                                       | 99.29                                     |
| SRF                | 376498                        | 2713               | 138.78            | 100                                      | 99.19                                     | 96.39                                     |

### Supplemental Figure S1. The mass spectrogram of c.1A>T mutant NKX2-6 protein

(a)

MS/MS Fragmentation of **GSEVHNAGGGGGDR**

Found in **A6NCS4**, Homeobox protein Nkx-2.6 OS=Homo sapiens GN=NKX2-6 PE=1 SV=1

Match to Query 9105: 1268.548688 from(635.281620,2+) intensity(182333.0313)

Title: File16165 Spectrum1101 scans: 1481

Data file TEST\_151221212047.mgf

Click mouse within plot area to zoom in by factor of two about that point

Or,  150  1150

Label all possible matches  Label matches used for scoring

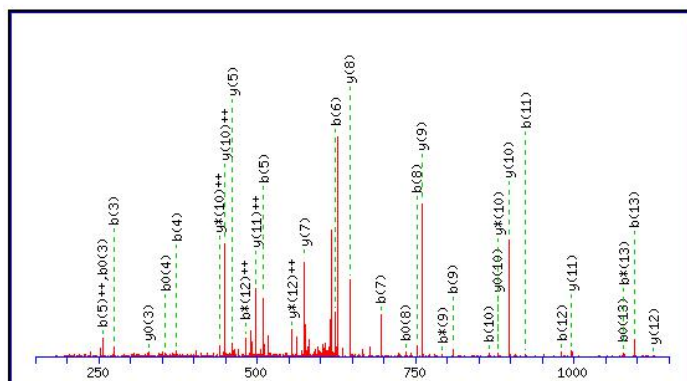

**Monoisotopic mass of neutral peptide Mr(calc):** 1268.5494

**Fixed modifications:** Carbamidomethyl (C) (apply to specified residues or termini only)

**Ions Score:** 71 **Expect:** 1.3e-006

**Matches :** 33/142 fragment ions using 60 most intense peaks ([help](#))

(b)

MS/MS Fragmentation of **KLDGSEPPGGPCEAVLEMDAER**

Found in **A6NCS4**, Homeobox protein Nkx-2.6 OS=Homo sapiens GN=NKX2-6 PE=1 SV=1

Match to Query 21597: 2356.064068 from(1179.039310,2+) intensity(69288.0156)

Title: File16165 Spectrum17017 scans: 18307

Data file TEST\_151221212047.mgf

Click mouse within plot area to zoom in by factor of two about that point

Or,  300  2000

Label all possible matches  Label matches used for scoring

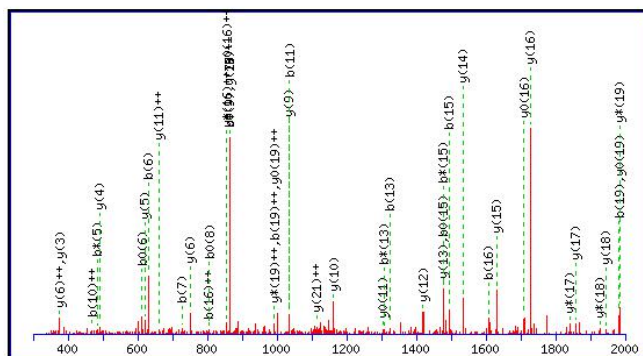

**Monoisotopic mass of neutral peptide Mr(calc):** 2356.0675

**Fixed modifications:** Carbamidomethyl (C) (apply to specified residues or termini only)

**Ions Score:** 68 **Expect:** 9e-007

**Matches :** 46/246 fragment ions using 85 most intense peaks ([help](#))



(c)

MS/MS Fragmentation of **MGEPQPGLNAASPLGGTR**

Found in **A6NCS4**, Homeobox protein Nkx-2.6 OS=Homo sapiens GN=NKX2-6 PE=1 SV=1

Match to Query 17370: 1808.884608 from(905.449580,2+) intensity(444951.1875)

Title: File16165 Spectrum13866 scans: 14999

Data file TEST\_151221212047.mgf

Click mouse within plot area to zoom in by factor of two about that point

Or,  200  1800

Label all possible matches  Label matches used for scoring

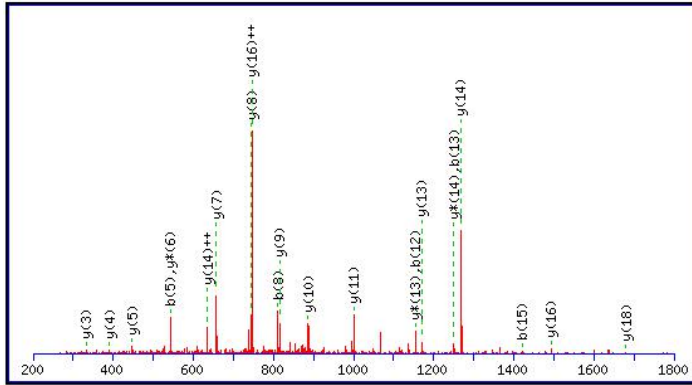

**Monoisotopic mass of neutral peptide Mr(calc):** 1808.8839

**Fixed modifications:** Carbamidomethyl (C) (apply to specified residues or termini only)

**Ions Score:** 89 **Expect:** 4.5e-009

**Matches :** 22/202 fragment ions using 31 most intense peaks [\(help\)](#)

(d)

MS/MS Fragmentation of **GVGNISGDSVR**

Found in **A6NCS4**, Homeobox protein Nkx-2.6 OS=Homo sapiens GN=NKX2-6 PE=1 SV=1

Match to Query 3444: 946.446808 from(474.230680,2+) intensity(1618272.1250)

Title: File16165 Spectrum2653 scans: 3171

Data file TEST\_151221212047.mgf

Click mouse within plot area to zoom in by factor of two about that point

Or,  100  950

Label all possible matches  Label matches used for scoring

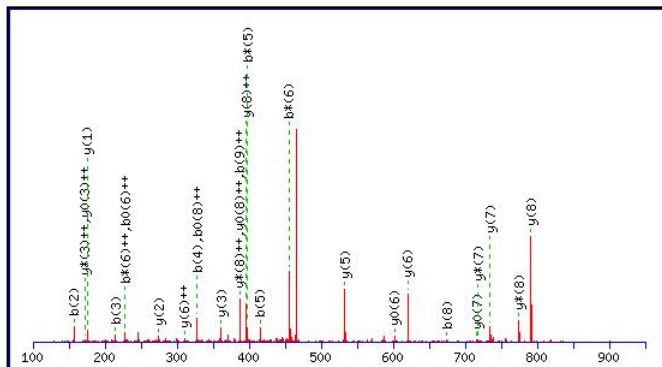

**Monoisotopic mass of neutral peptide Mr(calc):** 946.4468

**Fixed modifications:** Carbamidomethyl (C) (apply to specified residues or termini only)

**Ions Score:** 50 **Expect:** 0.00053

**Matches :** 28/90 fragment ions using 38 most intense peaks [\(help\)](#)

(e)

MS/MS Fragmentation of **VLFSQAQVLALER**

Found in **A6NCS4**, Homeobox protein Nkx-2.6 OS=Homo sapiens GN=NKX2-6 PE=1 SV=1

Match to Query 12755: 1472.835428 from(737.424990,2+) intensity(3606391.0000)

Title: File16165 Spectrum21505 scans: 23020

Data file TEST\_151221212047.mgf

Click mouse within plot area to zoom in by factor of two about that point

Or,  200  1500

Label all possible matches  Label matches used for scoring

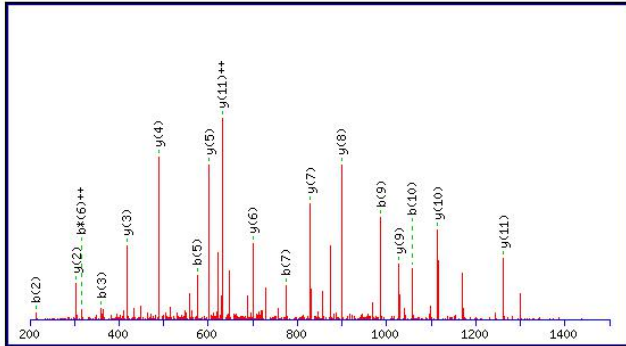

**Monoisotopic mass of neutral peptide Mr(calc):** 1472.8351

**Fixed modifications:** Carbamidomethyl (C) (apply to specified residues or termini only)

**Ions Score:** 85 **Expect:** 1.7e-007

**Matches :** 18/128 fragment ions using 25 most intense peaks ([help](#))

(f)

MS/MS Fragmentation of **YLSAPEREHLASALQLTSTQVK**

Found in **A6NCS4**, Homeobox protein Nkx-2.6 OS=Homo sapiens GN=NKX2-6 PE=1 SV=1

Match to Query 21894: 2441.288428 from(1221.651490,2+) intensity(82405.9297)

Title: File16165 Spectrum18080 scans: 19423

Data file TEST\_151221212047.mgf

Click mouse within plot area to zoom in by factor of two about that point

Or,  300  2000

Label all possible matches  Label matches used for scoring

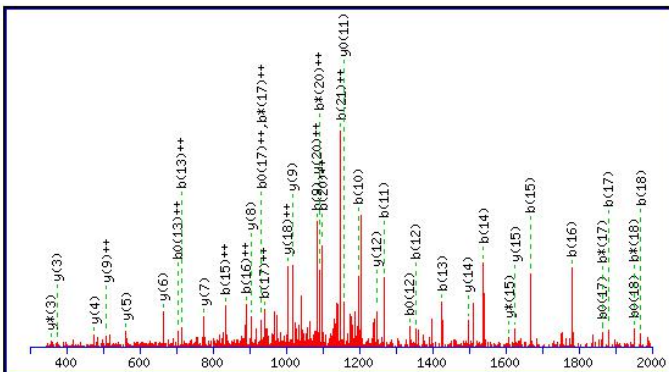

**Monoisotopic mass of neutral peptide Mr(calc):** 2441.2914

**Fixed modifications:** Carbamidomethyl (C) (apply to specified residues or termini only)

**Ions Score:** 58 **Expect:** 9.3e-005

**Matches :** 41/230 fragment ions using 68 most intense peaks ([help](#))

(g)

MS/MS Fragmentation of **EHLASALQLTSTQVK**

Found in **A6NCS4**, Homeobox protein Nkx-2.6 OS=Homo sapiens GN=NKX2-6 PE=1 SV=1

Match to Query 15143: 1624.877908 from(813.446230,2+) intensity(841126.3125)

Title: File16165 Spectrum14688 scans: 15862

Data file TEST\_151221212047.mgf

Click mouse within plot area to zoom in by factor of two about that point

Or,  200  1600

Label all possible matches  Label matches used for scoring

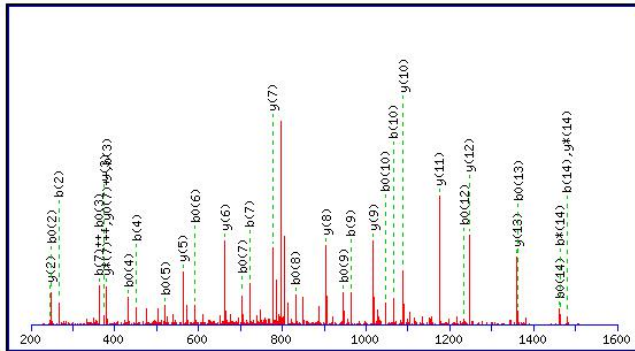

**Monoisotopic mass of neutral peptide Mr(calc):** 1624.8784

**Fixed modifications:** Carbamidomethyl (C) (apply to specified residues or termini only)

**Ions Score:** 101 **Expect:** 9.9e-010

**Matches :** 35/148 fragment ions using 39 most intense peaks ([help](#))

(h)

MS/MS Fragmentation of **IWFQNR**

Found in **A6NCS4**, Homeobox protein Nkx-2.6 OS=Homo sapiens GN=NKX2-6 PE=1 SV=1

Match to Query 2220: 862.444988 from(432.229770,2+) intensity(229491.8906)

Title: File16165 Spectrum14848 scans: 16030

Data file TEST\_151221212047.mgf

Click mouse within plot area to zoom in by factor of two about that point

Or,  100  900

Label all possible matches  Label matches used for scoring

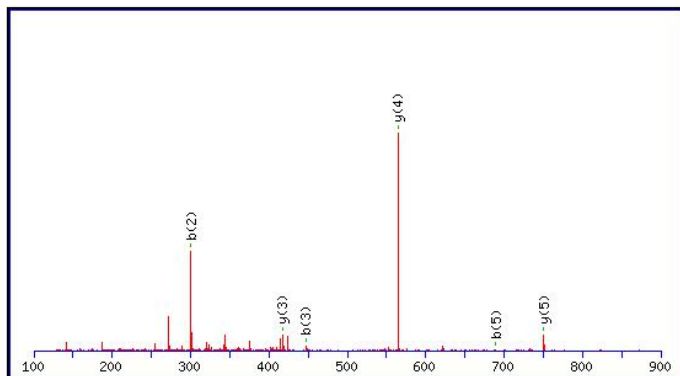

**Monoisotopic mass of neutral peptide Mr(calc):** 862.4450

**Fixed modifications:** Carbamidomethyl (C) (apply to specified residues or termini only)

**Ions Score:** 30 **Expect:** 0.052

**Matches :** 6/34 fragment ions using 7 most intense peaks ([help](#))

(i)

MS/MS Fragmentation of **SLELAGHPLTPR**

Found in **A6NCS4**, Homeobox protein Nkx-2.6 OS=Homo sapiens GN=NKX2-6 PE=1 SV=1

Match to Query 9553: 1289.709208 from(645.861880,2+) intensity(7040254.0000)

Title: File16165 Spectrum14285 scans: 15439

Data file TEST\_151221212047.mgf

Click mouse within plot area to zoom in by factor of two about that point

Or,  100 to  Da

Label all possible matches  Label matches used for scoring

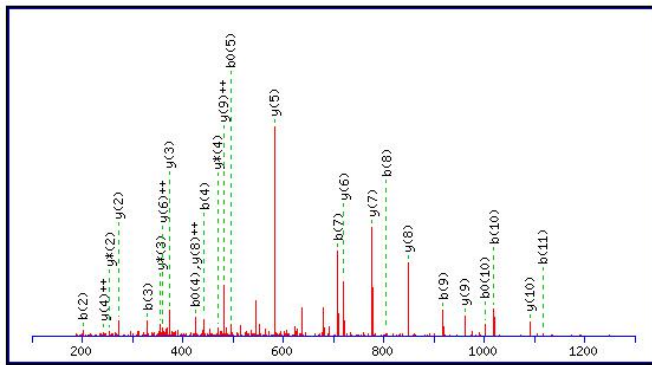

**Monoisotopic mass of neutral peptide Mr(calc):** 1289.7092

**Fixed modifications:** Carbamidomethyl (C) (apply to specified residues or termini only)

**Ions Score:** 61 **Expect:** 1.6e-005

**Matches :** 26/106 fragment ions using 43 most intense peaks ([help](#))

(j)

MS/MS Fragmentation of **RVAVPVLVR**

Found in **A6NCS4**, Homeobox protein Nkx-2.6 OS=Homo sapiens GN=NKX2-6 PE=1 SV=1

Match to Query 4364: 1007.659948 from(504.837250,2+) intensity(508194.4375)

Title: File16165 Spectrum14125 scans: 15271

Data file TEST\_151221212047.mgf

Click mouse within plot area to zoom in by factor of two about that point

Or,  100 to  Da

Label all possible matches  Label matches used for scoring

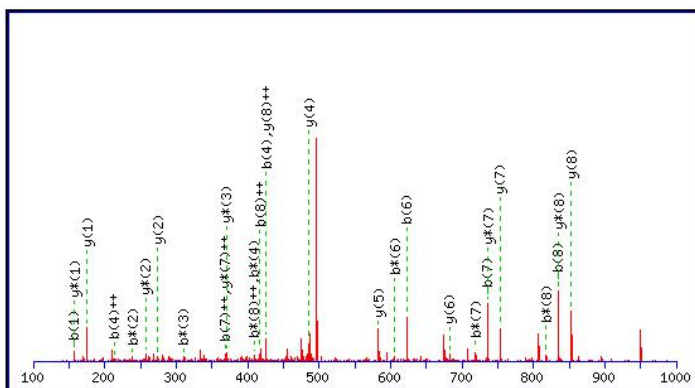

**Monoisotopic mass of neutral peptide Mr(calc):** 1007.6604

**Fixed modifications:** Carbamidomethyl (C) (apply to specified residues or termini only)

**Ions Score:** 29 **Expect:** 0.0028

**Matches :** 29/64 fragment ions using 72 most intense peaks ([help](#))

(k)

MS/MS Fragmentation of **VAVPVLVR**

Found in **A6NCS4**, Homeobox protein Nkx-2.6 OS=Homo sapiens GN=NKX2-6 PE=1 SV=1

Match to Query 2100: 851.558808 from(426.786680,2+) intensity(4451043.5000)

Title: File16165 Spectrum15685 scans: 16909

Data file TEST\_151221212047.mgf

Click mouse within plot area to zoom in by factor of two about that point

Or,  100  850

Label all possible matches  Label matches used for scoring

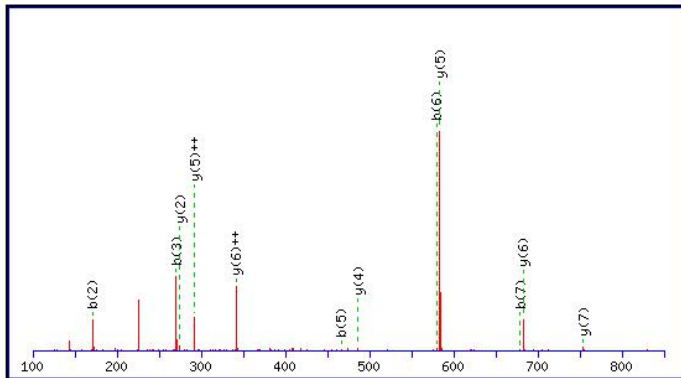

**Monoisotopic mass of neutral peptide Mr(calc):** 851.5593

**Fixed modifications:** Carbamidomethyl (C) (apply to specified residues or termini only)

**Ions Score:** 37 **Expect:** 0.00058

**Matches :** 12/42 fragment ions using 27 most intense peaks ([help](#))
